# Supplementary material
Source: HighWire-hosted journal article supplement (http://www.cmaj.ca/highwire/filestream/68580/field_highwire_adjunct_files/2/161485-res-2-at.pdf)
Supplement: 161485-res-2-at.pdf [file 161485-res-2-at.pdf]

**Appendix 2 (as supplied by the authors):** ICD-9 codes used to identify the composite outcome of venous thromboembolism

| <b>Codes (Description)</b>                                                      |
|---------------------------------------------------------------------------------|
| 415.1 (Pulmonary embolism and infarction)                                       |
| 451.1 (Phlebitis and thrombophlebitis of deep veins of lower extremities)       |
| 451.2 (Phlebitis and thrombophlebitis of lower extremities, unspecified)        |
| 451.8 (Phlebitis and thrombophlebitis of other sites)                           |
| 451.9 (Phlebitis and thrombophlebitis of unspecified site)                      |
| 453.0 (Budd-chiari syndrome)                                                    |
| 453.1 (Thrombophlebitis migrans)                                                |
| 453.2 (Other venous embolism and thrombosis of inferior vena cava)              |
| 453.3 (Other venous embolism and thrombosis of renal vein)                      |
| 453.4 (Acute venous embolism and thrombosis of deep vessels of lower extremity) |
| 453.8 (Acute venous embolism and thrombosis of other specified veins)           |
| 453.9 (Other venous embolism and thrombosis of unspecified site)                |
| 671.3 (Deep phlebothrombosis antepartum)                                        |
| 671.4 (Deep phlebothrombosis postpartum)                                        |
| 671.5 (Other phlebitis and thrombosis in pregnancy and the puerperium)          |
